# Supplementary material
Source: Springer Nature journal article supplement (https://www.springermedizin.de/resource/supplementary/12974_2011_404_MOESM6_ESM.pdf/9601586)

### Neocortex (5 months)

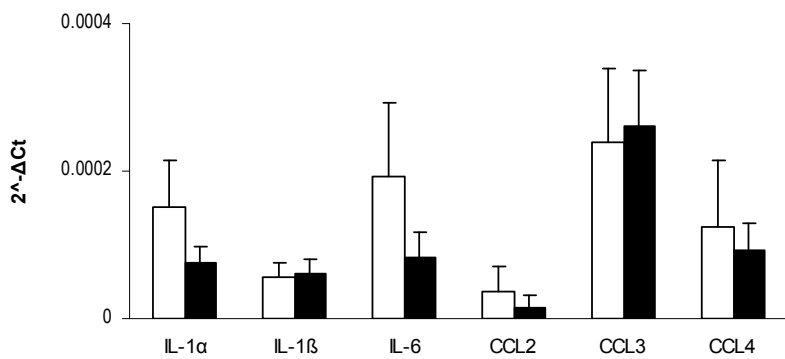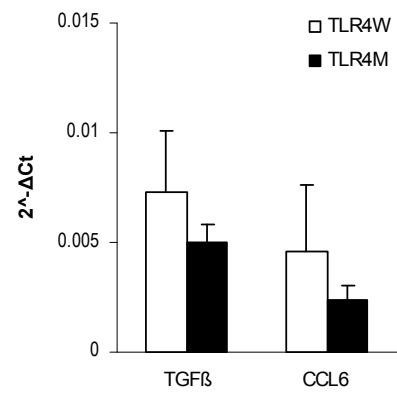

### Hippocampus (5 months)

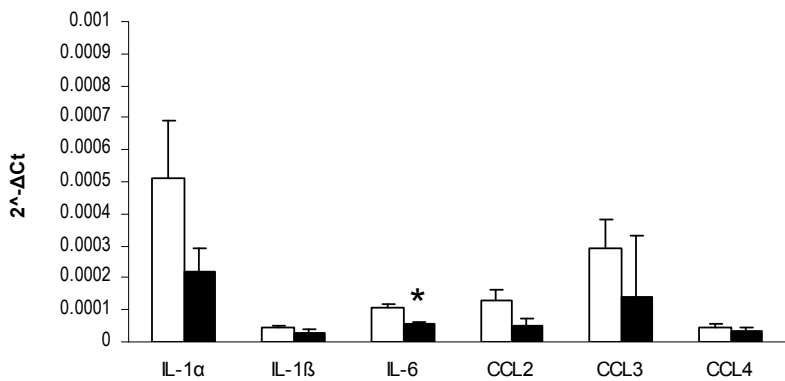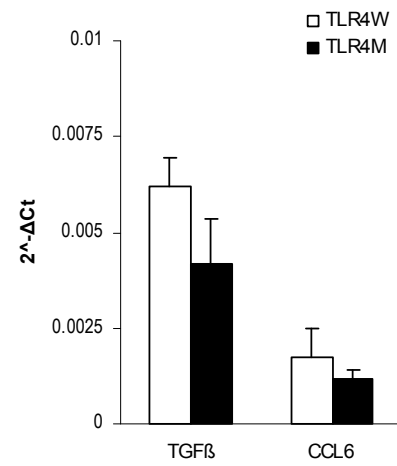

### Neocortex (9 months)

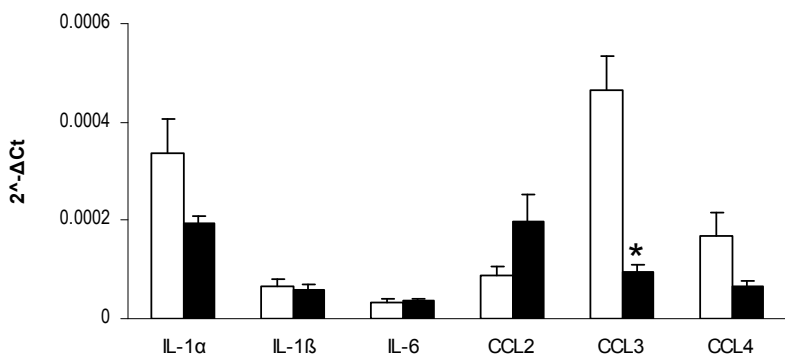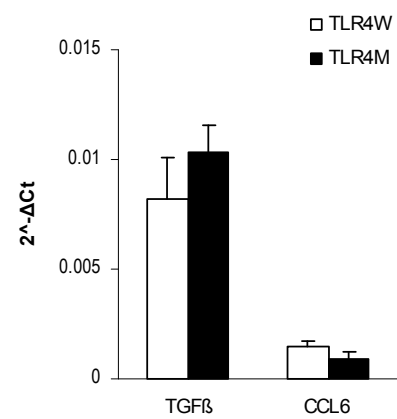

### Hippocampus (9 months)

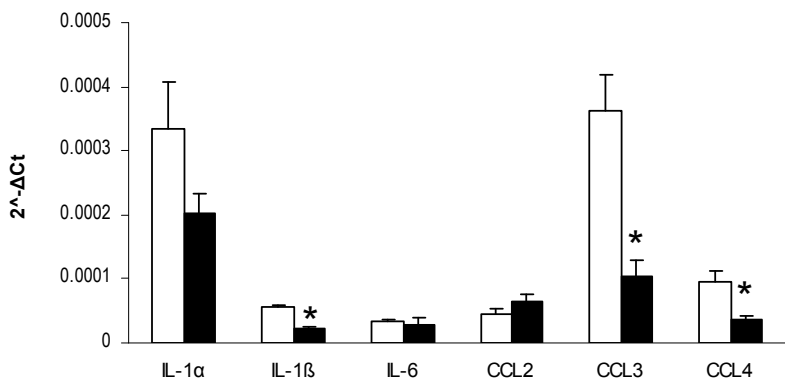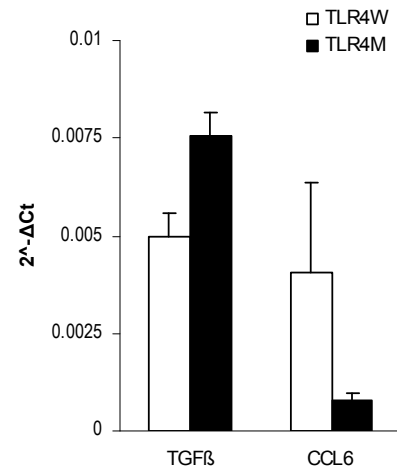

Supplement: MOESM6 [file 9601586]
